# Supplementary material for: Characterization of Schistosome Sox Genes and Identification of a Flatworm Class of Sox Regulators
Source: MDPI journal article supplement (doi:10.3390/pathogens12050690), 2023-05-09
Supplement: s1 [file s1]

```

MmSOX2 NP_035573 -MYNMMETELKPPGPQASGGGGGGGNATAAATGGNQKNSPDR VKRPMNAFMVWSRGQRR
HsSOX-2 NP_003097.1 -MYNMMETELKPPGPQQTs--GGGGGNSTAAAGGNQKNSPDR VKRPMNAFMVWSRGQRR
SmSoxS1 Smp_301790.3 MQSNLANNHL-----TVCNNNMNSEN IKRPMNAFMVWSRLQRR
* : . . * : * : . . : * : * * * * * * * * * *

MmSOX2 NP_035573 KMAQENPKMHNSEISKRLGAEWKLLSETEKRPFIIDEAKRLRALHMKHEPDYKYRPRRKT
HsSOX-2 NP_003097.1 KMAQENPKMHNSEISKRLGAEWKLLSETEKRPFIIDEAKRLRALHMKHEPDYKYRPRRKT
SmSoxS1 Smp_301790.3 KMAEENPKLHNSEISKQLGNLWKSLTNTDKIPFIEANRLRDCHMRRYPNYKYCPRRKR
* * * : * * * : * * * * . * * * * : * : * * * * * * * * * *

MmSOX2 NP_035573 TLMK-----KDKYTLPGLLAPGGNSMASGVGVGAGLGAGVNQRMDS-----YAHM
HsSOX-2 NP_003097.1 TLMK-----KDKYTLPGLLAPGGNSMASGVGVGAGLGAGVNQRMDS-----YAHM
SmSoxS1 Smp_301790.3 QPTNKVVVLQHKVKTTSELPLELVLCPTRSNCFQASRLTRVSKVVTQPFNKPRIPITAPT
: * . ** * : . * . . : : . * * : . *

MmSOX2 NP_035573 NGWS-NGSYSMMQEQLGYQPQHPGLNAHGAQMOPMHRVDVSALQYNSMTSSQTYMNGSPT
HsSOX-2 NP_003097.1 NGWS-NGSYSMMQDQLGYQPQHPGLNAHGAQMOPMHRVDVSALQYNSMTSSQTYMNGSPT
SmSoxS1 Smp_301790.3 KSYEITQNRNMFVNEMNHKPEP-FIITSQNMMPMS---NKLMPNICTSVQNLMDNNS
: . . . . * : : : : * : . : * * . * * * * . * . . :

MmSOX2 NP_035573 YSMSYSQQGTGPMALGSMGVSVKSEASSPPVVTSSSHSRAPCQAGDLRDMISMYLPGAE
HsSOX-2 NP_003097.1 YSMSYSQQGTGPMALGSMGVSVKSEASSPPVVTSSSHSRAPCQAGDLRDMISMYLPGAE
SmSoxS1 Smp_301790.3 AYLQSTD-----TIYDPYKTLQSLST--FLHNVNQHNITNYPDQKEFYTDF----N
: . : : : . * : * : : . . . . : * : : : :

MmSOX2 NP_035573 VPEPAAPSR LHMAQH---YQSGPVPVPG--TAINGTLPLSHM-
HsSOX-2 NP_003097.1 VPEPAAPSR LHMSQH---YQSGPVPVPG--TAINGTLPLSHM-
SmSoxS1 Smp_301790.3 VCQPTTSNVNNCNHELCPYDITHSPSEIYSSFSLDSIDLQTF
* : * : . . : : . * : * : * : : : : : * : :

```

| Life Stage | Copy Number (approx.) |
|------------|-----------------------|
| Sporocyst  | 24,000                |
| Cercaria   | 16,000                |
| 4hr SLA    | 38,000                |
| 24hr SLA   | 47,000                |
| 48hr SLA   | 47,000                |
| Adult      | 15,000                |
| Snail      | 0                     |

1
